# Supplementary material for: Creative Activities in Music – A Genome-Wide Linkage Analysis
Source: PubMed Central journal article supplement (PMC4766096; doi:10.1371/journal.pone.0148679), 2016-02-24

# NCNA

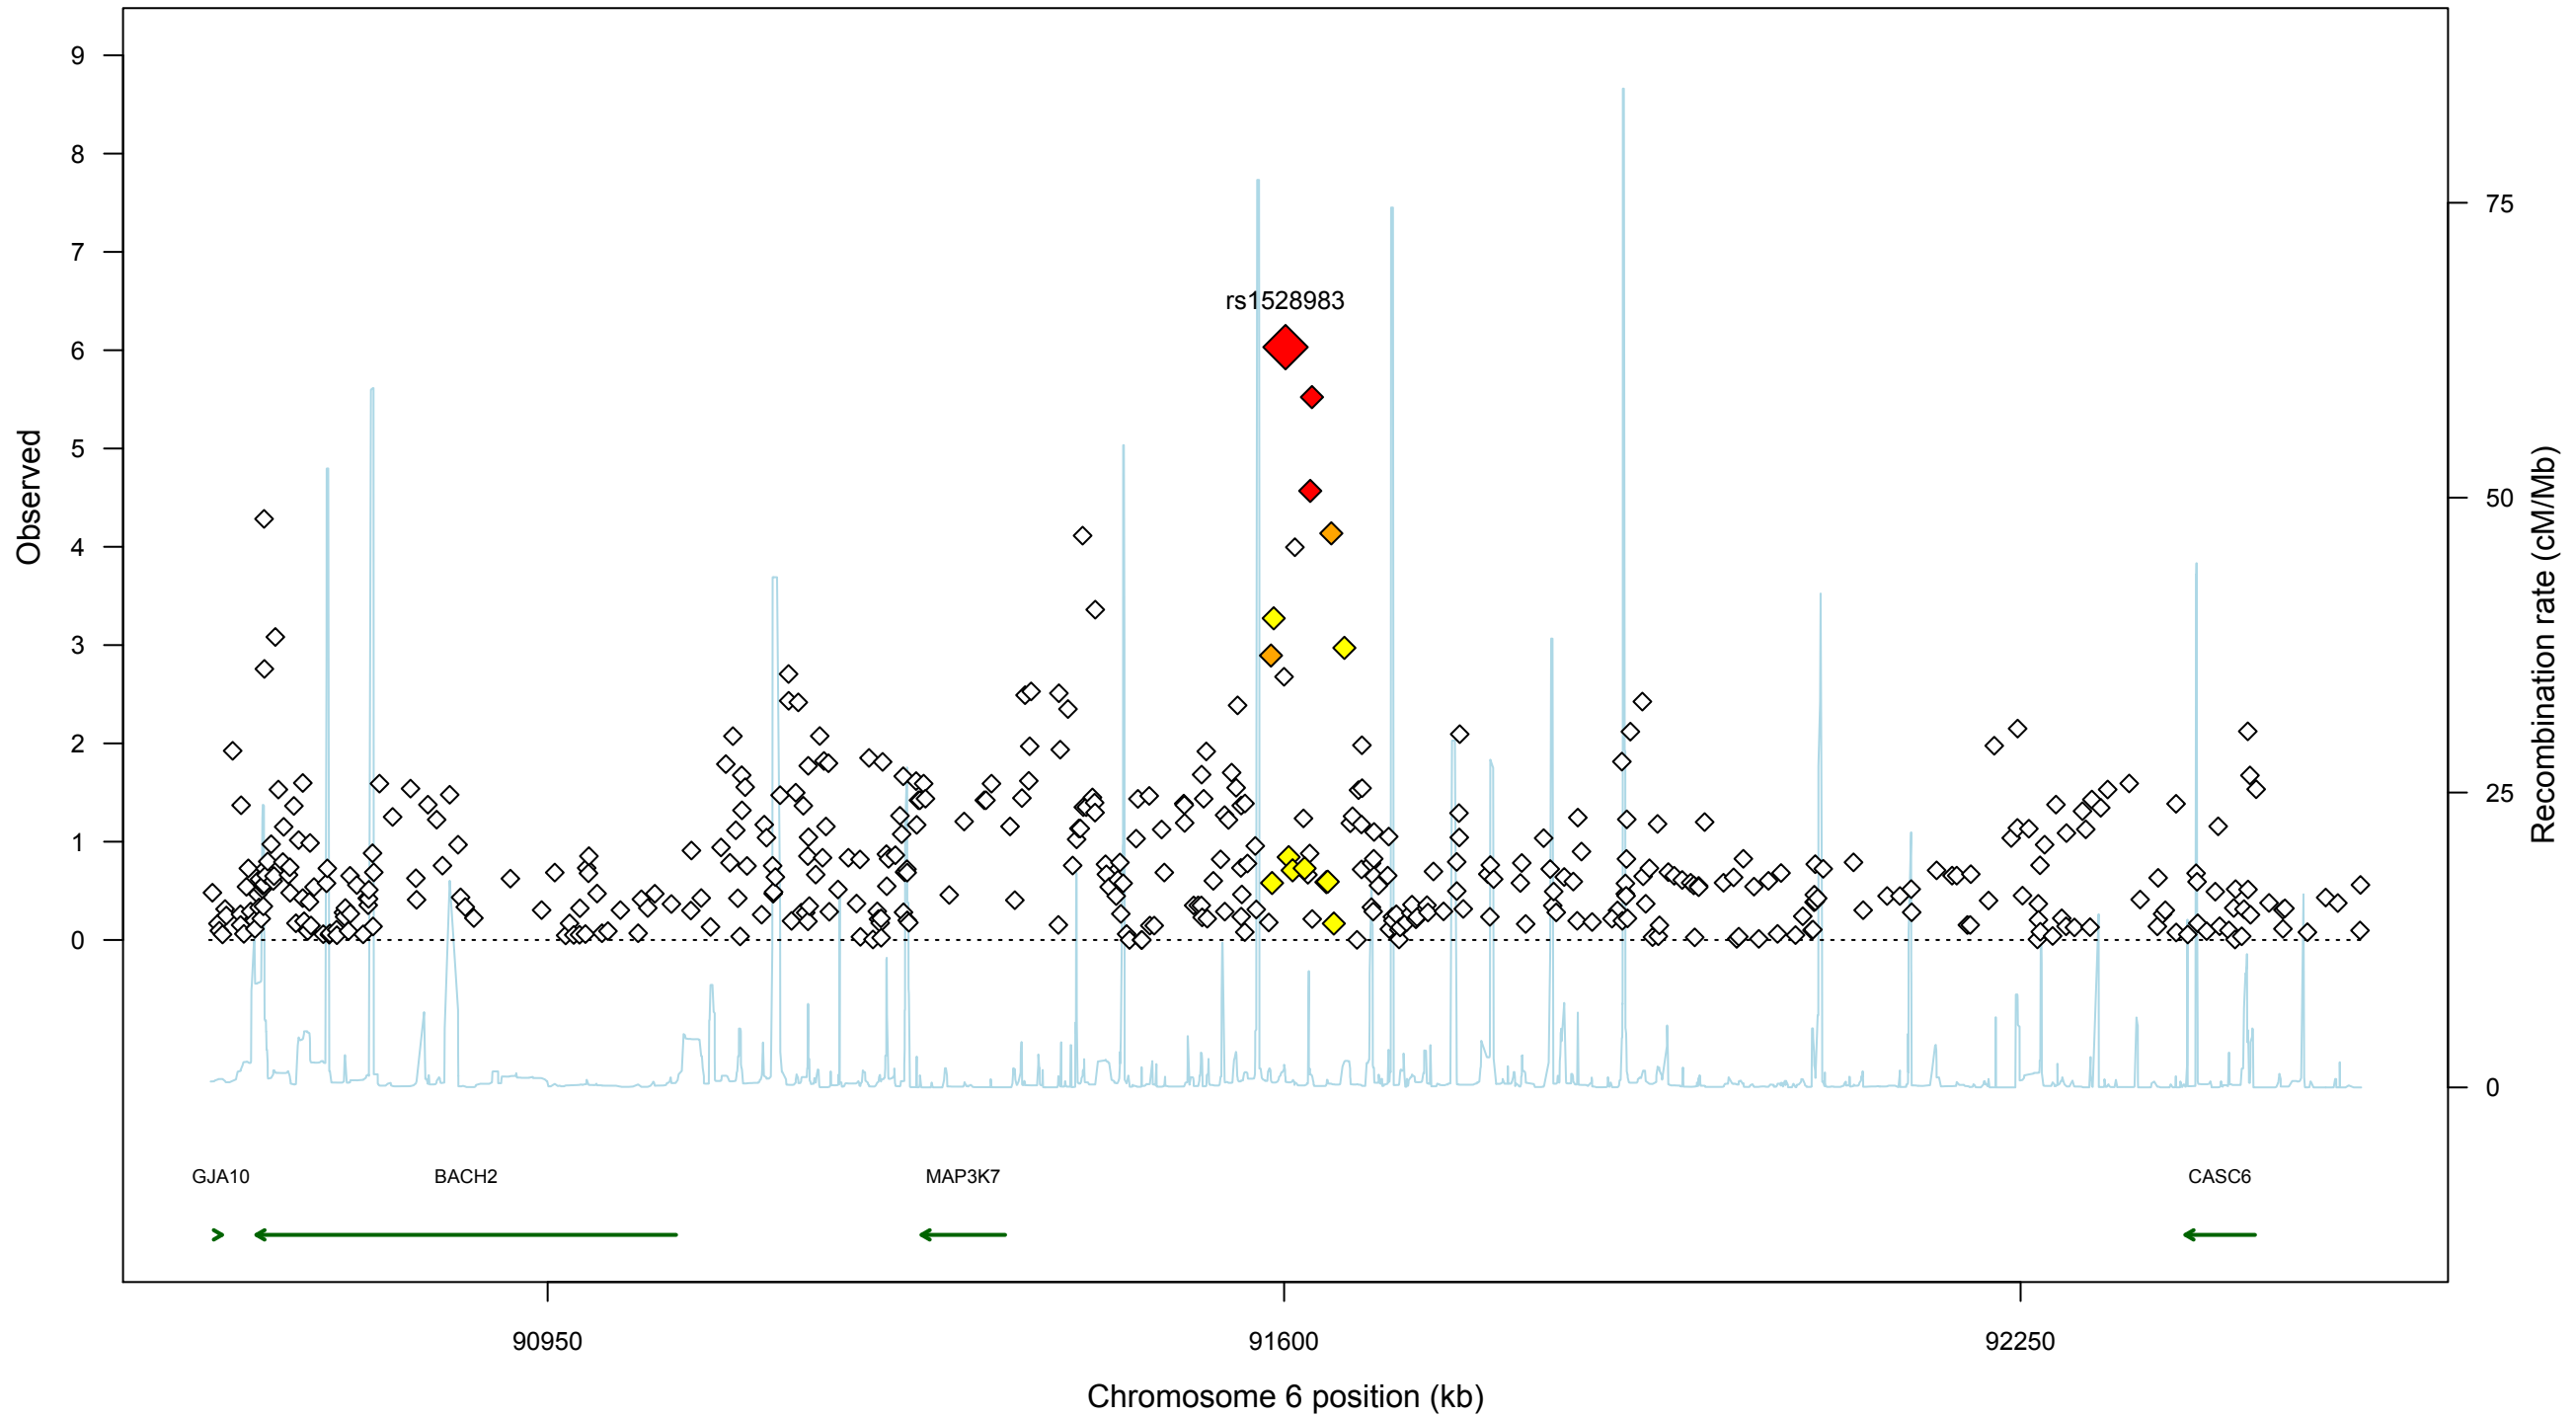

Supplement: pone.0148679.s007.pdf [file pone.0148679.s007.pdf]
