# Supplementary material for: Creative Activities in Music – A Genome-Wide Linkage Analysis
Source: PubMed Central journal article supplement (PMC4766096; doi:10.1371/journal.pone.0148679), 2016-02-24
Supplement: pone.0148679.s010.pdf [file pone.0148679.s010.pdf]

**S1 Table. Questionnaire considering creativity.**

| Explanation                                                                                                                                                                                                                                               | Question                                                         | Options                                                                                                                                                                                                                |
|-----------------------------------------------------------------------------------------------------------------------------------------------------------------------------------------------------------------------------------------------------------|------------------------------------------------------------------|------------------------------------------------------------------------------------------------------------------------------------------------------------------------------------------------------------------------|
| Composing refers here to creating new piece of music. It can be in any form: score, lead sheet, recording or some other form that can be shared with other people. It can also be of any length.                                                          | Do you compose?                                                  | <input type="checkbox"/> Yes<br><input type="checkbox"/> No<br><input type="checkbox"/> Did before, but not anymore<br><input type="checkbox"/> Don't know                                                             |
| Arranging refers here to making new presentable versions of compositions in such a way that the original composition can be identified.                                                                                                                   | Do you arrange?                                                  | <input type="checkbox"/> Yes<br><input type="checkbox"/> No<br><input type="checkbox"/> Did before, but not anymore<br><input type="checkbox"/> Don't know                                                             |
| Non-musical creativity refers here to visual, scientific, technical, physical and/or verbal creativity. For example drawing, writing and acting are usually creative. You can choose "very creative" even though you are very creative only in one field. | How creative do you consider yourself in non-musical creativity? | <input type="checkbox"/> Very creative<br><input type="checkbox"/> Quite creative<br><input type="checkbox"/> Slightly creative<br><input type="checkbox"/> Not at all creative<br><input type="checkbox"/> Don't know |
