# Supplementary material for: Creative Activities in Music – A Genome-Wide Linkage Analysis
Source: PubMed Central journal article supplement (PMC4766096; doi:10.1371/journal.pone.0148679), 2016-02-24
Supplement: pone.0148679.s011.pdf [file pone.0148679.s011.pdf]

**S2 Table. Overrepresented functions and diseases in the gene sets suggestively associated in joint linkage and LD analyses.**

| Diseases or Functions               | p-value  | Genes                                                                                                                                                                                                                                                                                                                                                                                                                                                                                                                                                                                                                                                             | # genes | Phenotype    |
|-------------------------------------|----------|-------------------------------------------------------------------------------------------------------------------------------------------------------------------------------------------------------------------------------------------------------------------------------------------------------------------------------------------------------------------------------------------------------------------------------------------------------------------------------------------------------------------------------------------------------------------------------------------------------------------------------------------------------------------|---------|--------------|
| Insulin-dependent diabetes mellitus | 4.33E-24 | <i>ABCF1, ABCG1, ABHD16A, ACTA2, AIF1, APOM, ATAT1, BAG6, C6orf15, C6orf47, C6orf48, CBS/LOC102724560, CDSN, CFB, COL27A1, DDR1, DDX39B, DHX16, DPCRI, EHMT2, FLOT1, GPANK1, GTF2H4, HCG22, HCP5, HLA-B,HLA-C, HSPA1A/HSPA1B, HSPA1L, IFIT1B, IFIT2, IFIT3, LSM2, LST1, LTA, LY6G5B, LY6G5C, LY6G6C, LY6G6D, MCCD1, MDC1, MICA, MICB, MSH5, MUC21, MZB1,NEBL, NELFE, PCDH15, POU5F1, PRRC2A, PSORS1C1, SKIV2L, SLC44A4, STK19,TCF19,TNF, TNFSF8, TUBB, UBASH3A, VARS2,VWA7, ZBTB12</i>                                                                                                                                                                            | 63      | Other creat. |
| Systemic autoimmune syndrome        | 1,01E-16 | <i>ABCF1,ABCG1, ABHD16A, ACTA2, AIF1, APOM, ATAT1, BAG6, BLNK, C2, C4A/C4B, C6orf15, C6orf47, C6orf48, C9orf152, CBS/LOC102724560, CCHCR1, CDSN, CFB, CLU, COL27A1, DDR1, DDX39B, DHX16,DPCRI,EGR2,EHMT2,EPHX2, FAS, FLOT1, GNL1, GPANK1, GTF2H4, HCG22, HCG27, HCP5, HLA-B, HLA-C,HSPA1A/ HSPA1B, HSPA1L,IFIT1,IFIT1B, IFIT2, IFIT3, LSM2, LST1, LTA, LTB, LY6G5B, LY6G5C,LY6G6C,LY6G6D, MBL2, MCCD1, MDC1, MICA, MICB, MSH5, MUC21,MX1,MZB1,NCR3, NEBL, NELFE, NFKBIL1, NRM, PCDH15,PLAC4, POU5F1, PRRC2A, PSORS1C1, PTK2B, SIL1, SKIV2L, SLC44A4, STK19, TCF19, TMEM173, TNF, TNFSF11, TNFSF15, TNFSF8 ,TUBB, TXN, UBASH3A, VARS, VARS2, VIM, VWA7, ZBTB12</i> | 90      | Other creat. |
| Rheumatoid arthritis                | 8,08E-12 | <i>AIF1, APOM, ATAT1, BAG6, BLNK, C2, C4A/C4B, C6orf15, C6orf47, C9orf152, CCHCR1, CFB, CLU, DDR1, DDX39B, DHX16, DPCRI, EHMT2, EPHX2, GNL1, GPANK1, GTF2H4, HCG22, HCG27, HLA-C, HSPA1A/ HSPA1B, HSPA1L, LST1, LTA,LTB, LY6G5C, LY6G6C, LY6G6D, MBL2, MCCD1, MDC1, MICA, MSH5, NELFE, NFKBIL1, NRM, PCDH15, PLAC4,PRRC2A,PSORS1C1,PTK2B, SIL1, SKIV2L, SLC44A4, STK19,TMEM173,TNF, TNFSF11, TNFSF15, TXN ,VARS, VARS2,VIM, ZBTB12</i>                                                                                                                                                                                                                            | 59      | Other creat. |
| Chronic inflammatory disease        | 9,56E-09 | <i>ACTA2, ADRA1A, AIF1, APOM, ATAT1, BAG6, BLNK, BM11, C2, C4A/ C4B, C6orf15, C6orf47, C9orf152, CCHCR1, CFB, CLU, DDR1, DDX39B, DHX16, DPCRI, DSCI, EHMT2, EPHX2, FAS, GNL1, GPANK1, GTF2H4, HCG22, HCG27, HGF, HLA-C, HSPA1A/ HSPA1B, HSPA1L, LST1,LTA, LTB,LY6G5C, LY6G6C, LY6G6D, MBL2, MCCD1, MDC1, MICA, MSH5,NELFE, NFKBIL1, NRM, PBLD, PCDH15,PLAC4, PRRC2A, PSORS1C1, PTK2B, SIL1, SKIV2L, SLC44A4, STK19, TMEM173,TNF, TNFSF11, TNFSF15, TNFSF8, TXN, VARS, VARS2, VIM, ZBTB12</i>                                                                                                                                                                      | 67      | Other creat. |
| Multiple sclerosis                  | 1,65E-08 | <i>ADRA1A, BAG6, C4A/C4B, C6orf15, CDSN, DHX16,EGR1, EHMT2, EPST11,FAS,HCG22, HLA-E, IFIT1,MCCD1, MX1, NELFE ,POLE3, POU5F1, PRRC2A, PSORS1C1, RRM2B, TCF19, TNF</i>                                                                                                                                                                                                                                                                                                                                                                                                                                                                                              | 23      | Other creat. |
| Acquired immunodeficiency syndrome  | 7,05E-08 | <i>C4A/C4B, C6orf48, CLU, FAS, HCP5, HLA-C, MICB, PSORS1C1, TNF</i>                                                                                                                                                                                                                                                                                                                                                                                                                                                                                                                                                                                               | 9       | Other creat. |
| Malignant solid tumor               | 1.31E-07 | *                                                                                                                                                                                                                                                                                                                                                                                                                                                                                                                                                                                                                                                                 | 372     | NCNA         |
|                                     | 1.85E-06 |                                                                                                                                                                                                                                                                                                                                                                                                                                                                                                                                                                                                                                                                   | 423     | Composing    |
|                                     | 1.94E-05 |                                                                                                                                                                                                                                                                                                                                                                                                                                                                                                                                                                                                                                                                   | 432     | Arranging    |
|                                     | 1.54E-05 |                                                                                                                                                                                                                                                                                                                                                                                                                                                                                                                                                                                                                                                                   | 427     | Other creat. |
| Cleavage of collagen fiber          | 1.02E-06 | <i>MMP1, MMP13, MMP3, MMP8</i>                                                                                                                                                                                                                                                                                                                                                                                                                                                                                                                                                                                                                                    | 4       | NCNA         |
| Cancer                              | 1.52E-06 | *                                                                                                                                                                                                                                                                                                                                                                                                                                                                                                                                                                                                                                                                 | 436     | Composing    |
|                                     | 2.77E-06 |                                                                                                                                                                                                                                                                                                                                                                                                                                                                                                                                                                                                                                                                   | 378     | NCNA         |
|                                     | 4.81E-06 |                                                                                                                                                                                                                                                                                                                                                                                                                                                                                                                                                                                                                                                                   | 448     | Arranging    |
|                                     | 9,30E-05 |                                                                                                                                                                                                                                                                                                                                                                                                                                                                                                                                                                                                                                                                   |         | Other creat. |
| X linked autism                     | 2.09E-06 | <i>MECP2, NLGN3, RPL10, TMLHE</i>                                                                                                                                                                                                                                                                                                                                                                                                                                                                                                                                                                                                                                 | 4       | Arranging    |
| Abdominal adenocarcinoma            | 3.55E-06 | *                                                                                                                                                                                                                                                                                                                                                                                                                                                                                                                                                                                                                                                                 | 228     | NCNA         |
| X-linked hereditary disease         | 4.01E-06 | <i>ABCD1, ADRA1A, AVPR2, BNIP3L, CLIC2, DKC1, EMD, F8, FLNA, G6PD, GDH1, GJB1, HCF1, HDAC8, IKBK, IL2RG, L1CAM, MECP2, MED12, NAA10, OPN1LW, OPN1MW, RAB39B, TAZ, TGFB1</i>                                                                                                                                                                                                                                                                                                                                                                                                                                                                                       | 25      | Arranging    |

|                                               |          |                                                                                                                                                                    |     |              |
|-----------------------------------------------|----------|--------------------------------------------------------------------------------------------------------------------------------------------------------------------|-----|--------------|
| Development of multicellular organism         | 4.19E-06 | <i>DRG1, EN2, HOXA1, HOXA10, HOXA11, HOXA4, HOXA9, LIF, MYCNOS, NEUROG3, OSM, PLXNA3, RPS4X, TP53, ZMYM3</i>                                                       | 15  | Arranging    |
| Cleavage of glycoprotein                      | 4.91E-06 | <i>MMPI, MMP13, MMP3, MMP8, PCSK5</i>                                                                                                                              | 5   | NCNA         |
| Cell death                                    | 8.83E-06 | *                                                                                                                                                                  | 157 | Other creat. |
|                                               | 2.39E-05 |                                                                                                                                                                    | 159 | Arranging    |
|                                               | 6.29E-05 |                                                                                                                                                                    | 134 | NCNA         |
| Apoptosis                                     | 8.90E-06 | *                                                                                                                                                                  | 129 | Other creat. |
|                                               | 9.73E-05 |                                                                                                                                                                    | 127 | Arranging    |
| Morphogenesis of embryonic skeleton           | 9.95E-06 | <i>HOXA2, HOXA3, HOXA4, HOXA5, HOXA6, HOXA7, MEGF8, MYCN, WNT9A</i>                                                                                                | 9   | Arranging    |
| Cell death of male germ cells                 | 1.40E-05 | <i>BCL6, DMRTC2, ETV5, HORMAD2, HOXA11, LIMK2, MOV10L1, OSBP2, PAFAH1B3, SHBG, TASP1, TP53, YBX2</i>                                                               | 13  | Arranging    |
| Compartmentalization of B lymphocytes         | 1.48E-05 | <i>LTA, LTB, TNF</i>                                                                                                                                               | 3   | Other creat. |
| Proteolysis of Gelatin                        | 1.49E-05 | <i>MMP1, MMP10, MMP12, MMP13, MMP3, MMP7</i>                                                                                                                       | 6   | NCNA         |
| Cell death of germ cells                      | 1.53E-05 | <i>AXL, BCL6, DMRTC2, ETV5, HORMAD2, HOXA11, LIF, LIMK2, MOV10L1, OSBP2, PAFAH1B3, SHBG, TASP1, TP53, YBX2</i>                                                     | 15  | Arranging    |
| Quantity of rib                               | 2.07E-05 | <i>BMPER, HOXA10, HOXA11, HOXA4, HOXA5, HOXA6, HOXA9, SHH, TASP1</i>                                                                                               | 9   | Arranging    |
| Unwinding of RNA                              | 2.76E-05 | <i>DDX21, DDX50, EIF4A1, EIF4A2</i>                                                                                                                                | 4   | Arranging    |
| Patterning of rostrocaudal axis               | 2.81E-05 | <i>HOXA1, HOXA10, HOXA11, HOXA2, HOXA3, HOXA4, HOXA5, HOXA6, HOXA7, HOXA9, SHH, WNT3A</i>                                                                          | 12  | Arranging    |
| Morphology of vertebrae                       | 2.84E-05 | <i>BMPER, DVL2, HOXA10, HOXA11, HOXA3, HOXA4, HOXA5, HOXA6, HOXA9, SHH, TASP1, TGFB1, WNT3A, WNT9A</i>                                                             | 14  | Arranging    |
| Morphology of rhombencephalon                 | 3.15E-05 | <i>AXL, CLN3, EBF2, EN2, GABRB3, HOXA1, HOXA2, KHDRBS2, LICAM, LIF, PATZ1, PLXNB2, TP53, UBE3A, WNT3A</i>                                                          | 15  | Arranging    |
| Proliferation of B lymphocytes                | 3.65E-05 | <i>ARHGEF1, AXL, BANK1, BCL6, BLNK, CD19, CD79A, GAPT, IL21R, IL27, IL2RG, IL4R, MYCN, PATZ1, PIK3AP1, PIM3, POU2F2, SHH, ST6GAL1, TGFB1, TNFSF13, TP53, WNT3A</i> | 23  | Arranging    |
| Apoptosis of male germ cells                  | 3.67E-05 | <i>BCL6, DMRTC2, ETV5, HORMAD2, HOXA11, LIMK2, OSBP2, PAFAH1B3, SHBG, TASP1, TP53, YBX2</i>                                                                        | 12  | Arranging    |
| Brachydactyly mental retardation syndrome     | 3.84E-05 | <i>GPC1, GPR35, HDAC4</i>                                                                                                                                          | 3   | NCNA         |
| Hypertrophy of connective tissue              | 5.11E-05 | <i>HDAC4, MC4R, MMP3, NOG, STC1, WNT5A, XBP1</i>                                                                                                                   | 7   | NCNA         |
| Killing of E. coli                            | 5.22E-05 | <i>DEFA1, DEFB1, DEFB103A/DEFB103B, TICAM1, WNT5A</i>                                                                                                              | 5   | NCNA         |
| Hallucinations                                | 5.96E-05 | <i>CCKAR, HTR6, NPAS3</i>                                                                                                                                          | 3   | Composing    |
| Transport of histamine                        | 5.96E-05 | <i>SLC22A1, SLC22A2, SLC22A3</i>                                                                                                                                   | 3   | Composing    |
| Demyelination of fiber tract                  | 6.58E-05 | <i>CXCR3, GAL3ST1, TGFB1</i>                                                                                                                                       | 3   | Arranging    |
| Cerebral malaria                              | 6.77E-05 | <i>C4A/C4B, CFB, LTA, TNF</i>                                                                                                                                      | 4   | Other creat. |
| Cell death of gonadal cells                   | 6.92E-05 | <i>AXL, BCL6, DMRTC2, ETV5, HORMAD2, HOXA11, LIF, LIMK2, MOV10L1, OSBP2, PAFAH1B3, SHBG, TASP1, TGFB1, TP53, YBX2</i>                                              | 16  | Arranging    |
| Morphology of cells                           | 7.02E-05 | *                                                                                                                                                                  | 100 | Arranging    |
| Abnormal morphology of glossopharyngeal nerve | 7.93E-05 | <i>HOXA1, HOXA2, HOXA3, MEGF8</i>                                                                                                                                  | 4   | Arranging    |
| Dysmyelination                                | 8.21E-05 | <i>ABCD1, ADIPOQ, CD19, CTC1, CXCR3, EBF2, GAL3ST1, GJB1, GJC2, IKBKG, LIF, MLC1, TGFB1</i>                                                                        | 13  | Arranging    |
| Adenocarcinoma                                | 8.46E-05 | *                                                                                                                                                                  | 239 | NCNA         |
| Abnormal morphology of                        | 8.76E-05 | <i>AXL, CLN3, EBF2, EN2, GABRB3, HOXA1, HOXA2, KHDRBS2, LICAM, LIF, PATZ1, TP53, UBE3A, WNT3A</i>                                                                  | 14  | Arranging    |

|                                     |          |                                                                                                                                                                                                                                                                |     |              |
|-------------------------------------|----------|----------------------------------------------------------------------------------------------------------------------------------------------------------------------------------------------------------------------------------------------------------------|-----|--------------|
| rhombencephalon                     |          |                                                                                                                                                                                                                                                                |     |              |
| Necrosis                            | 9.27E-05 | *                                                                                                                                                                                                                                                              | 121 | Other creat. |
| Neutralization of Influenza A virus | 9.44E-05 | <i>DEFA1, DEFA5, DEFA6</i>                                                                                                                                                                                                                                     | 3   | NCNA         |
| Morphology of gonadal cells         | 9.54E-05 | <i>AXL, CTDNEP1, DMRTC2, ETV5, FETUB, HORMAD2, HOXA10, LIMK2, LIPE, MNS1, OSBP2, PAFAH1B3, PLA2G3, SH2B1, SPEM1, TASPI, TP53, YBX2</i>                                                                                                                         | 18  | Arranging    |
| Morphology of reproductive system   | 9.55E-05 | <i>AXL, BMPR1B, BRAF, CITED1, CTDNEP1, DMRTC2, EBF2, ERF, ETV5, FETUB, G6PD, GAL3ST1, HORMAD2, HOXA10, HOXA11, IL2RG, LIF, LIMK2, LIPE, MNS1, MOV10L1, NUPR1, OSBP2, PAFAH1B3, PATZ1, PLA2G3, PLK2, SH2B1, SLC34A2, SLIT2, SPEM1, TASPI, TGFB1, TP53, YBX2</i> | 35  | Arranging    |

\* List of associated genes is not shown for functions with 100 or more genes.
